# Supplementary material for: World Trade Center Exposure and Posttraumatic Growth: Assessing Positive Psychological Change 15 Years after 9/11
Source: PubMed Central journal article supplement (PMC7795403; doi:10.3390/ijerph18010104), 2020-12-25
Supplement: ijerph-18-00104-s001.pdf [file ijerph-18-00104-s001.pdf]

**Table S1. Characteristics of Study Sample by Moderate-to-high Posttraumatic Growth with 10 items.**

| <i>Characteristics</i>                            | <i>Moderate Posttraumatic Growth</i> |                                  |                                 | <i>p-value</i> |
|---------------------------------------------------|--------------------------------------|----------------------------------|---------------------------------|----------------|
|                                                   | <i>Overall</i><br>( <i>N</i> =4,934) | <i>Yes</i><br>( <i>N</i> =1,522) | <i>No</i><br>( <i>N</i> =3,412) |                |
| <b>Age (yr)</b>                                   | 43.0 (35.0, 49.0)                    | 44.0 (37.0, 51.0)                | 42.0 (34.0, 49.0)               | <0.001         |
| <b>Sex</b>                                        |                                      |                                  |                                 | <0.001         |
| Male                                              | 3,227 (65%)                          | 917 (60%)                        | 2,310 (68%)                     |                |
| Female                                            | 1,707 (35%)                          | 605 (40%)                        | 1,102 (32%)                     |                |
| <b>Race/Ethnicity</b>                             |                                      |                                  |                                 | <0.001         |
| White                                             | 3,922 (79%)                          | 1,092 (72%)                      | 2,830 (83%)                     |                |
| Black or African American                         | 322 (7%)                             | 180 (12%)                        | 142 (4%)                        |                |
| Hispanic or Latino (any race)                     | 407 (8%)                             | 174 (11%)                        | 233 (7%)                        |                |
| Asian (includes Native Hawaiian/Pacific Islander) | 161 (3%)                             | 47 (3%)                          | 114 (3%)                        |                |
| Multiracial/Other                                 | 122 (2%)                             | 29 (2%)                          | 93 (3%)                         |                |
| <b>Education</b>                                  |                                      |                                  |                                 | <0.001         |
| Less than high school                             | 41 (1%)                              | 9 (1%)                           | 32 (1%)                         |                |
| High school only                                  | 761 (15%)                            | 286 (19%)                        | 475 (14%)                       |                |
| Some college                                      | 1,272 (26%)                          | 454 (30%)                        | 818 (24%)                       |                |
| At least a Bachelor's                             | 2,860 (58%)                          | 773 (51%)                        | 2,087 (61%)                     |                |
| <b>Marital Status</b>                             |                                      |                                  |                                 | 0.11           |
| Married or living with partner                    | 3,449 (70%)                          | 1,057 (69%)                      | 2,392 (70%)                     |                |
| Divorced or separated                             | 476 (10%)                            | 156 (10%)                        | 320 (9%)                        |                |
| Widowed                                           | 65 (1%)                              | 28 (2%)                          | 37 (1%)                         |                |
| Never married                                     | 944 (19%)                            | 281 (18%)                        | 663 (19%)                       |                |
| <b>Self-Efficacy</b>                              | 16.0 (15.0, 19.0)                    | 17.0 (15.0, 20.0)                | 16.0 (15.0, 19.0)               | <0.001         |
| <b>Social Support W3</b>                          | 15.0 (11.0, 20.0)                    | 16.0 (12.0, 20.0)                | 15.0 (11.0, 19.0)               | <0.001         |
| <b>Social Integration W2</b>                      |                                      |                                  |                                 | <0.001         |
| Low/medium                                        | 2,497 (51%)                          | 613 (40%)                        | 1,884 (55%)                     |                |
| High                                              | 2,437 (49%)                          | 909 (60%)                        | 1,528 (45%)                     |                |
| <b>PCL Total Score W1</b>                         | 26.0 (20.0, 36.0)                    | 28.0 (21.0, 37.0)                | 25.0 (20.0, 36.0)               | <0.001         |
| <b>PCL Total Score W2</b>                         | 28.0 (21.0, 40.0)                    | 28.0 (21.0, 40.0)                | 27.0 (21.0, 39.0)               | 0.11           |
| <b>PCL Total Score W3</b>                         | 27.0 (20.0, 38.0)                    | 27.0 (20.0, 38.0)                | 27.0 (20.0, 38.0)               | 0.42           |
| <b>PCL Total Score W4</b>                         | 25.0 (19.0, 35.0)                    | 24.0 (19.0, 34.0)                | 25.0 (19.0, 36.0)               | 0.2            |
| <b>9/11 Exposure</b>                              |                                      |                                  |                                 | <0.001         |
| None/Low                                          | 1,057 (21%)                          | 289 (19%)                        | 768 (23%)                       |                |
| Medium                                            | 1,728 (35%)                          | 500 (33%)                        | 1,228 (36%)                     |                |
| High                                              | 1,233 (25%)                          | 412 (27%)                        | 821 (24%)                       |                |
| Very High                                         | 916 (19%)                            | 321 (21%)                        | 595 (17%)                       |                |

Note: Values expressed as N (%) or median (25<sup>th</sup>, 75<sup>th</sup> percentiles). P-value comparisons across groups for categorical variables are based on chi-square test of homogeneity; p-values for continuous variables are based on ANOVA or Kruskal-Wallis test for median

**Table S2. Multivariable Linear Regression Models with 9/11 Related Exposures, PTSS, and Psychosocial Factors with Posttraumatic Growth (10-item total score).**

| <b>Variable</b>            | <b><math>\beta</math></b> | <b>95% CI</b> | <b>p</b> |
|----------------------------|---------------------------|---------------|----------|
| <b>9/11 Exposure*</b>      |                           |               |          |
| None/Low                   | Reference                 |               |          |
| Medium                     | 0.78                      | (-0.03, 1.60) | 0.0603   |
| High                       | 2.67                      | (1.79, 3.55)  | <0.0001  |
| Very High                  | 3.55                      | (2.60, 4.51)  | <0.0001  |
| <b>PCL Total Score W1*</b> | 0.06                      | (0.04, 0.09)  | <0.0001  |
| <b>PCL Total Score W2*</b> | 0.04                      | (0.02, 0.06)  | <0.0001  |
| <b>PCL Total Score W3*</b> | 0.02                      | (-0.00, 0.04) | 0.0899   |
| <b>PCL Total Score W4*</b> | -0.01                     | (-0.03, 0.02) | 0.6494   |

| <b>PCL Improvement W1-W4*</b>       |           |              |         |
|-------------------------------------|-----------|--------------|---------|
| <5 (No positive change)             | Reference |              |         |
| 5 to 9 (Minimal positive change)    | 1.75      | (0.88, 2.61) | <0.0001 |
| 10 to 19 (Moderate positive change) | 2.3       | (1.34, 3.25) | <0.0001 |
| ≥ 20 (Significant positive change)  | 4.12      | (2.63, 5.61) | <0.0001 |
| <b>Social Integration *</b>         |           |              |         |
| Low/medium                          | Reference |              |         |
| High                                | 2.89      | (2.30, 3.49) | <0.0001 |
| <b>Social Support*</b>              | 0.25      | (0.19, 0.30) | <0.0001 |
| <b>Self-Efficacy*</b>               | 0.56      | (0.46, 0.67) | <0.0001 |

\*Adjusted for age, sex, race, education, and marital status  
β=beta; 95% CI= 95% Confidence Interval; p=p-value
